# Supplementary material
Source: Springer Nature journal article supplement (https://www.springermedizin.de/resource/supplementary/12879_2012_2477_MOESM3_ESM.pdf/9444664)
Supplement: MOESM3 [file 9444664]

| <b>Variable</b>                                                                         | <b>Relative Risk based on the Development Set</b> | <b>95% CI</b>  | <b>P-Value</b> |
|-----------------------------------------------------------------------------------------|---------------------------------------------------|----------------|----------------|
| <b>Age</b>                                                                              |                                                   |                |                |
| Age < 30 years or > 79 years                                                            | 1.183                                             | (1.001, 1.391) | 0.049          |
| <b>Prior Healthcare Exposure</b>                                                        |                                                   |                |                |
| Recent hospitalization (for $\geq 2$ days and within the last 90 days)                  | 1.556                                             | (1.291, 1.859) | <0.001         |
| Nursing home/skilled nursing facility/long term acute care exposure within last 90 days | 1.509                                             | (1.212, 1.859) | <0.001         |
| Prior intravenous antibiotic therapy within the last 30 days                            | 1.619                                             | (1.075, 2.340) | 0.022          |
| <b>Severity of Illness</b>                                                              |                                                   |                |                |
| Intensive Care Unit Admission (on or before index culture)                              | 1.652                                             | (1.380, 1.961) | <0.001         |
| <b>Comorbid Illness</b>                                                                 |                                                   |                |                |
| Cerebrovascular Disease (any), prior to admission                                       | 1.233                                             | (0.920, 1.628) | 0.159          |
| Dementia                                                                                | 1.548                                             | (1.160, 2.024) | 0.003          |
| Female with diabetes mellitus                                                           | 1.327                                             | (1.071, 1.630) | 0.010          |
